# Supplementary material for: Transfection reagent artefact likely accounts for some reports of extracellular vesicle function
Source: PubMed Central journal article supplement — J Extracell Vesicles. 2022 Oct 10;11(10):e12253. doi: 10.1002/jev2.12253 (PMC9549734; doi:10.1002/jev2.12253), 2022-10-10
Supplement: JEV2-11-e12253-s001.pdf [file JEV2-11-e12253-s001.pdf]

Supplemental Table I.

| REAGENT, KIT, OR CONSUMABLE           | VENDOR          | PART #      | ADDITIONAL INFORMATION                     |
|---------------------------------------|-----------------|-------------|--------------------------------------------|
| <b>Immunoblotting Antibodies</b>      |                 |             | <b>Blotting Conditions</b>                 |
| Mouse monoclonal anti-CD9             | BioLegend       | 312102      | Non-reduced, 1:1,000                       |
| Mouse monoclonal anti-CD81            | ThermoFisher    | 10630D      | Reduced, 1:1,000                           |
| Rabbit polyclonal anti-Cre            | Abcam           | ab190177    | Non-reduced, 1:1,000                       |
| Rabbit monoclonal anti-HMGB1          | Abcam           | ab79823     | Non-reduced, 1:1,000                       |
| Rabbit polyclonal anti-HistoneH3      | Abcam           | ab1791      | Non-reduced, 1:1,000                       |
| Goat polyclonal anti-Rabbit IgG HRP   | Abcam           | ab6721      | 1:5,000                                    |
| Goat polyclonal anti-Mouse IgG HRP    | Abcam           | ab97203     | 1:5,000                                    |
| <b>Exosome Isolation</b>              |                 |             |                                            |
| Quick-Seal Ultra-Clear 100 mL tubes   | Beckman Coulter | 345778      |                                            |
| Ultra-Clear 38.5 mL tubes             | Beckman Coulter | 344058      |                                            |
| Ultra-Clear 13 mL tubes               | Beckman Coulter | 344059      |                                            |
| OptiPrep™ Density Gradient Medium     | Millipore Sigma | D1556-250ML | 60% iodixanol solution                     |
| <b>SDS-PAGE and Western Blotting</b>  |                 |             |                                            |
| 4–20% TGX Stain-Free™ protein gels    | Bio-Rad         | 4568996     |                                            |
| PBS with 1% Casein                    | Bio-Rad         | 1610783     |                                            |
| Clarity™ Western ECL substrate        | Bio-Rad         | 1705060     |                                            |
| Trans-Blot mini PVDF transfer packs   | Bio-Rad         | 1704156     |                                            |
| 4x Laemmli sample buffer              | Bio-Rad         | 1610747     |                                            |
| 10x Tris/Glycine/SDS                  | Bio-Rad         | 1610772     |                                            |
| MagicMark XP Western protein standard | ThermoFisher    | LC5602      |                                            |
| <b>Transfection Reagents</b>          |                 |             | <b>Reagent used per mL of cell culture</b> |
| ExpiFectamine                         | ThermoFisher    | A14524      | 0.5 µL, 1.0 µg DNA                         |
| PEI (M.W. 25,000)                     | Polysciences    | 23966       | 2.0 µL, 1.0 µg DNA                         |
| PEI Max (M.W. 40,000)                 | Polysciences    | 24765       | 2.0 µL, 1.0 µg DNA                         |
| Lipofectamine 2000                    | ThermoFisher    | 11668019    | 2.5 µL, 1.25 µg DNA                        |
| Lipofectamine 3000                    | ThermoFisher    | L3000008    | 1.5 µL, 1.25 µg DNA                        |
